# Supplementary material for: BUB1 Promotes Gemcitabine Resistance in Pancreatic Cancer Cells by Inhibiting Ferroptosis
Source: MDPI journal article supplement (doi:10.3390/cancers16081540), 2024-04-18

**Figure 2F&2H**

**Pan1 (n E50) MIA(N E50)**

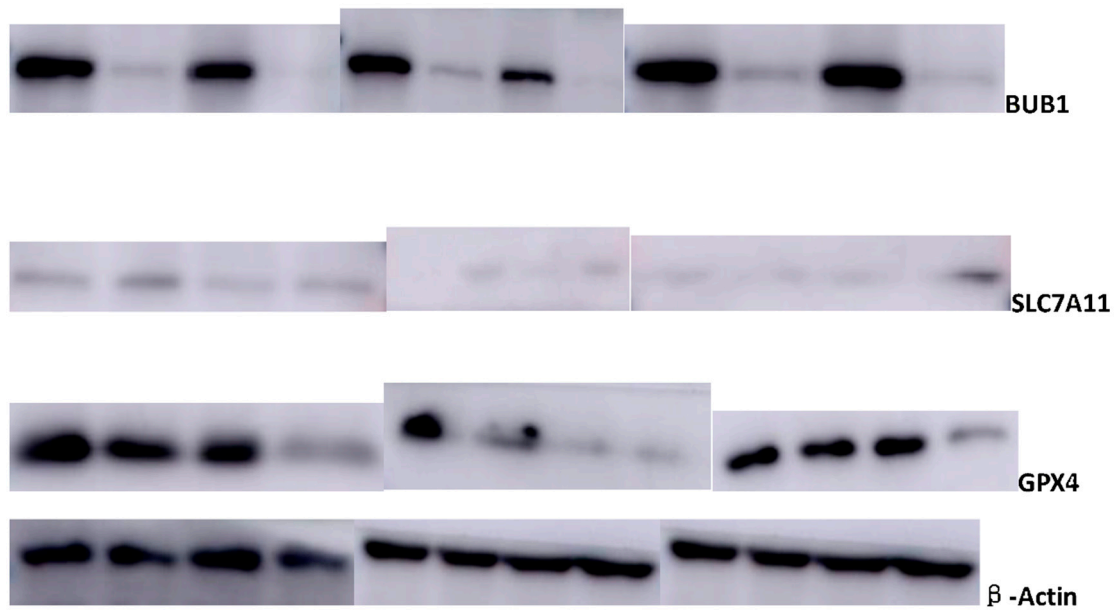

**Figure 3**

**Figure 3B**

**Bub1(pan1)**

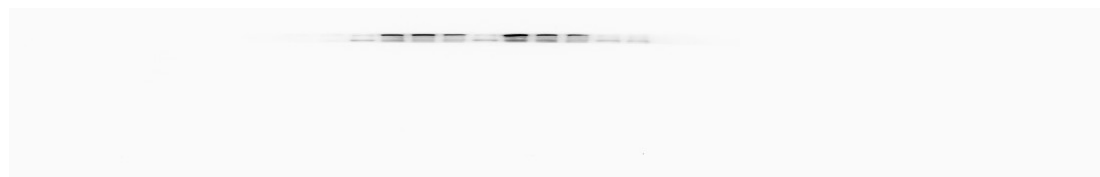

**Actin(pan1)**

**Bub1(mia)**

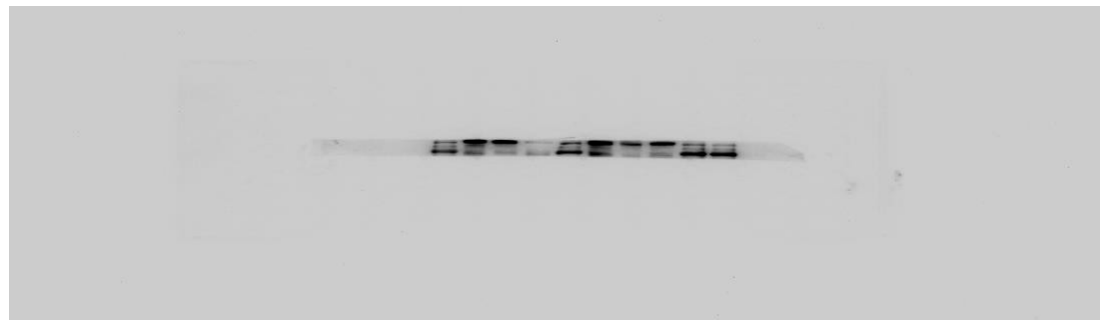

**Actin(mia)**

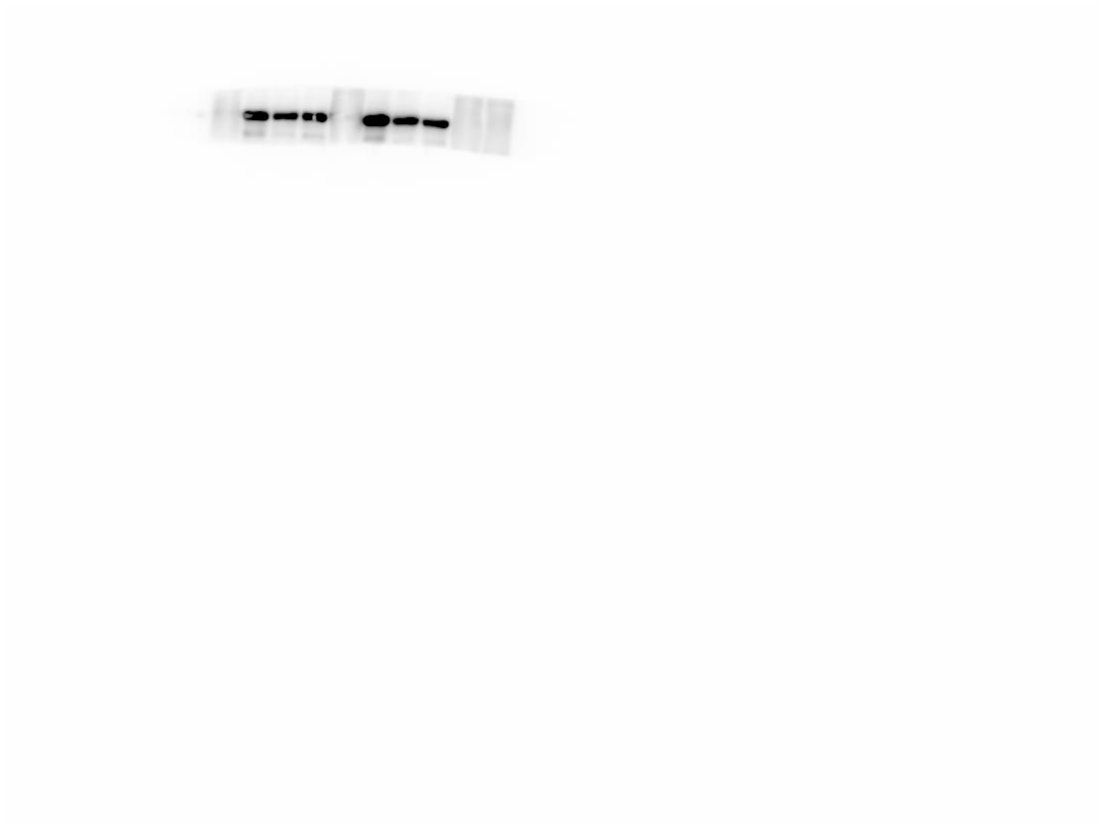

Bub1(mia)

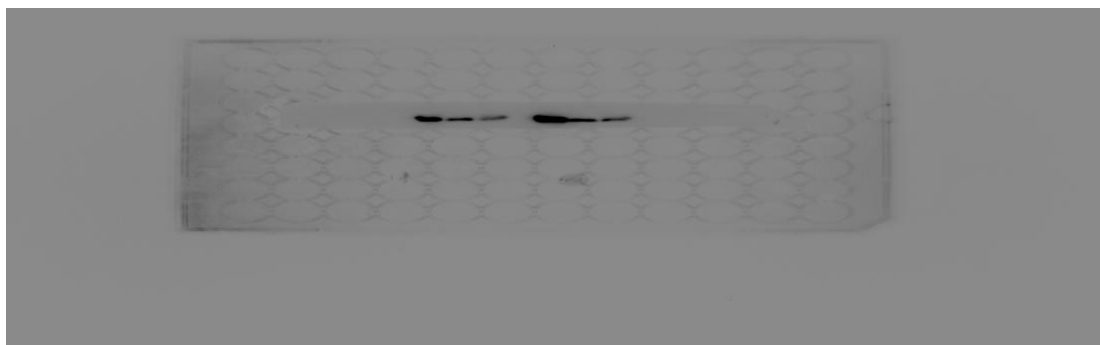

Actin(mia)

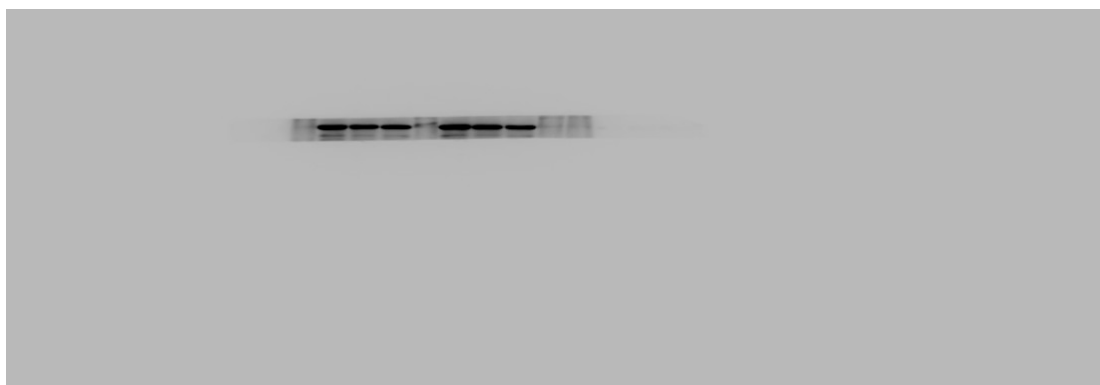

Bub1(pan1)

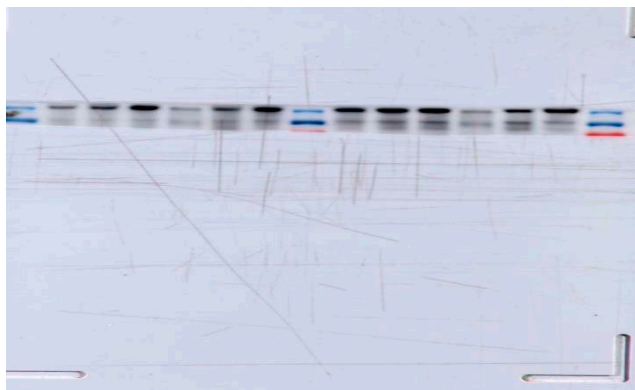

Actin(pan1)

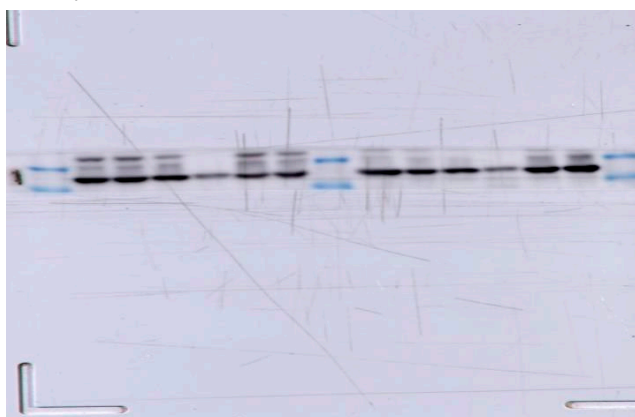

Figure 3a

Actin(pan Next 4 items)

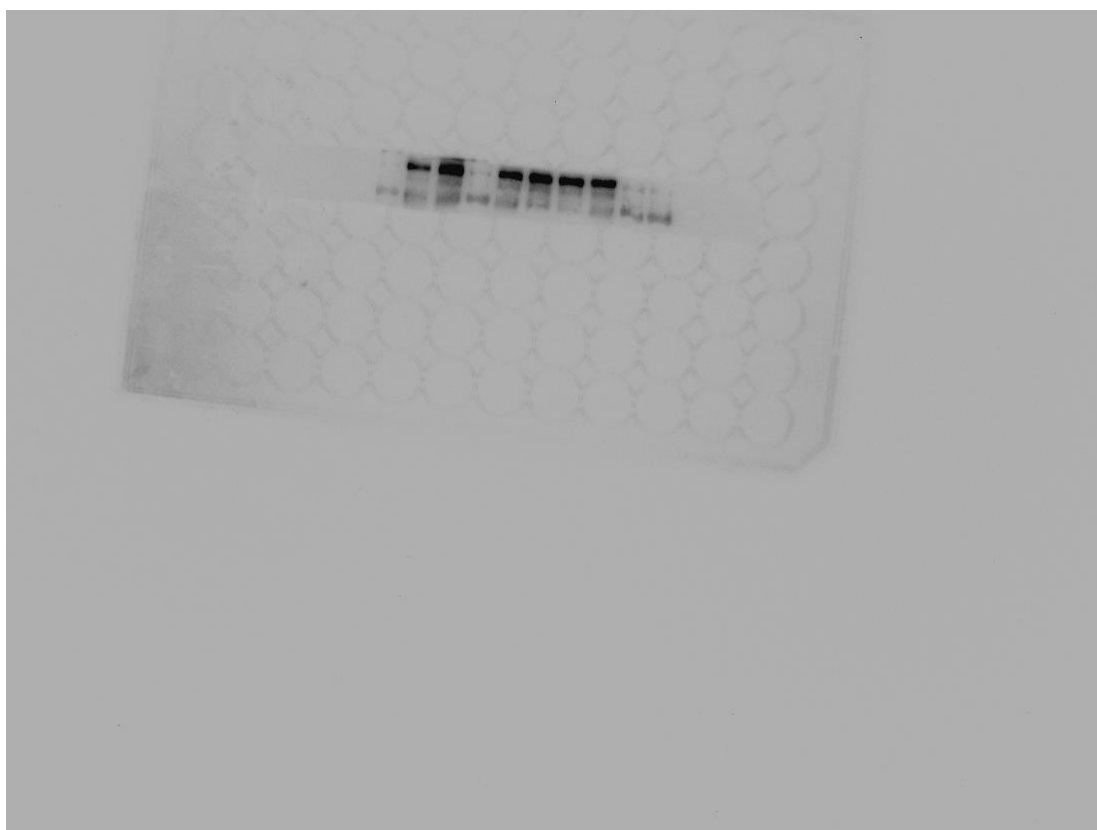

BUB1(pan1 Next 4 items)

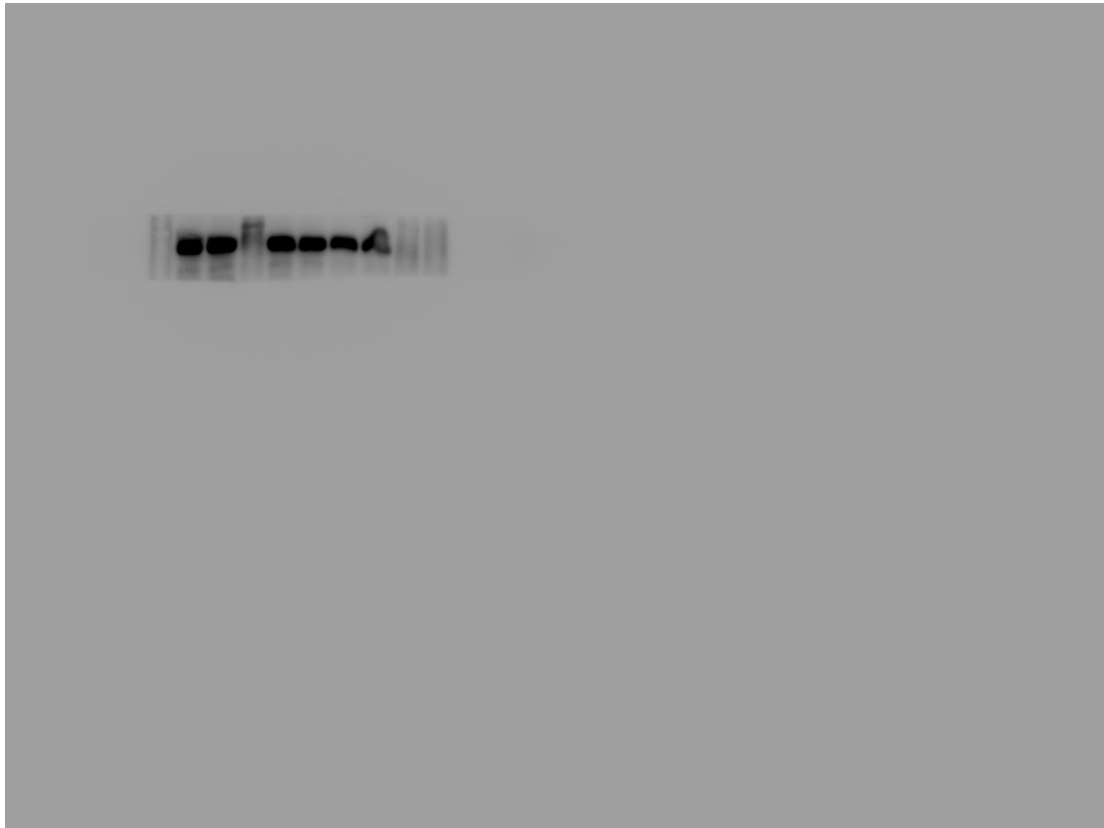

Actin(mia Next 4 items)

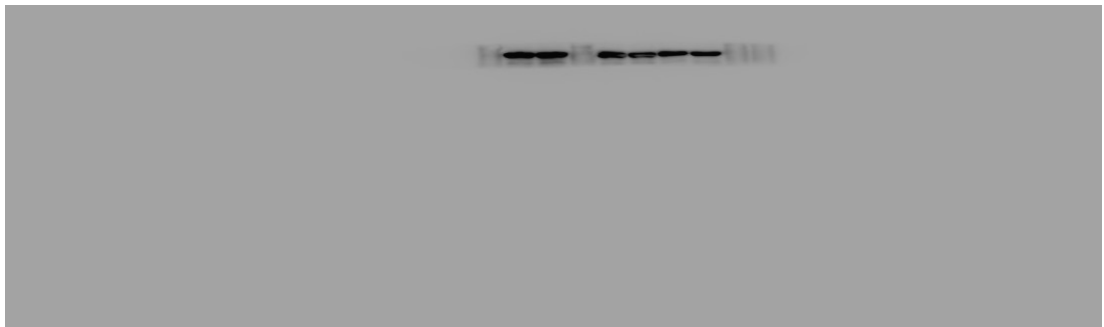

Bub1 (mia Next 4 items)

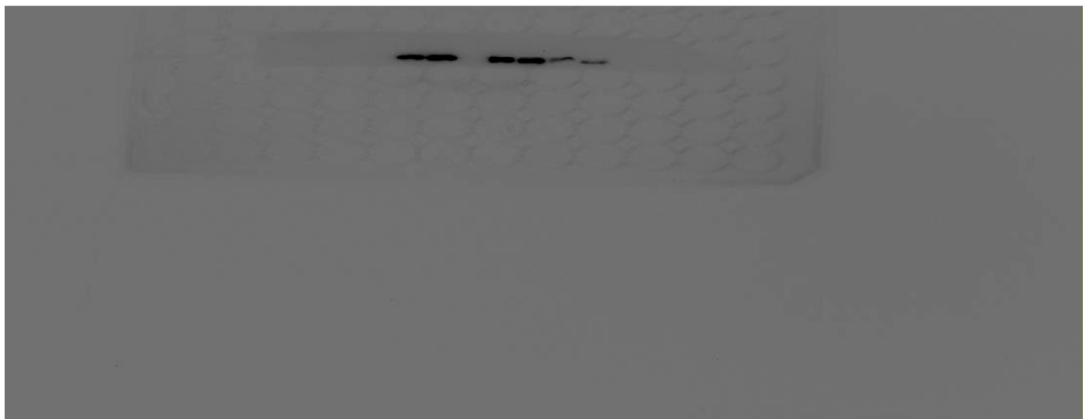

Due to the loss of the U disk after graduation of the first student who did this experiment, some of the above repeated experiment strips were missing.

Figure 4B

BUB1 (n=3)

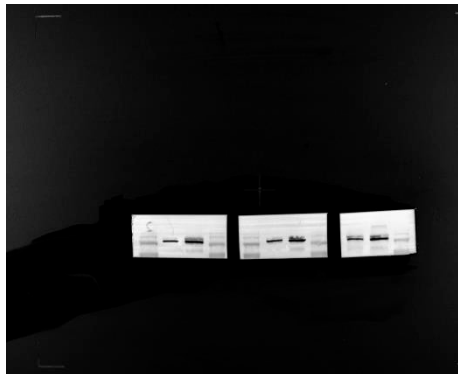

NF2 (n=3)

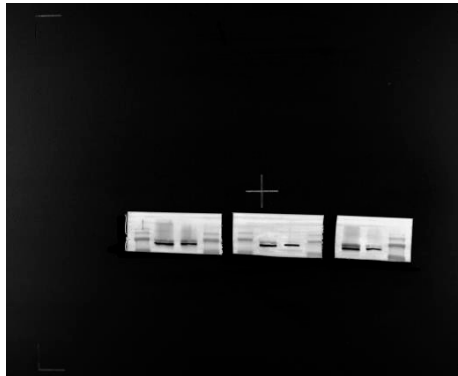

YAP (n=3)

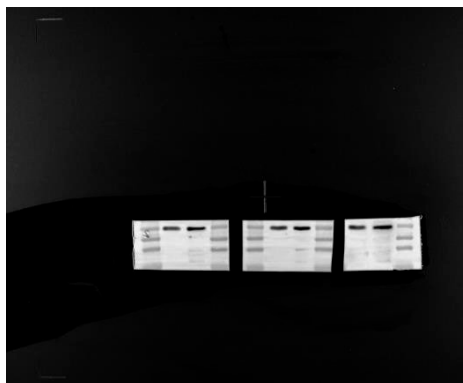

MOB1 (n=3)

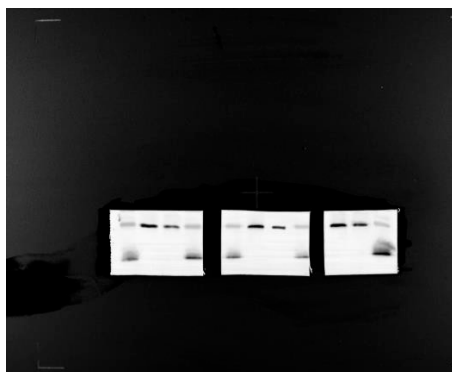

**GAPDH (n=3)**

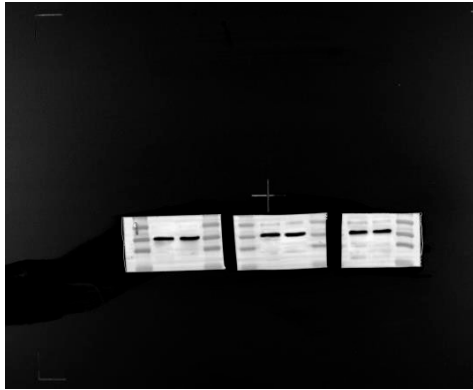

**Figure 4E**

**BUB1 (n=3)**

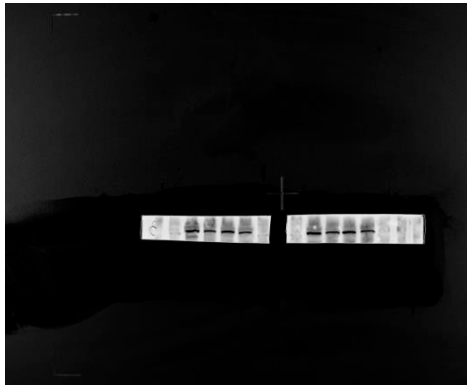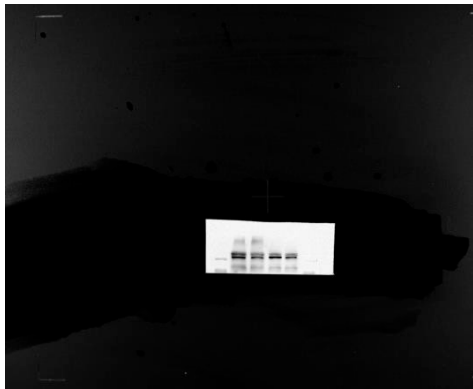

**NF2 (n=3)**

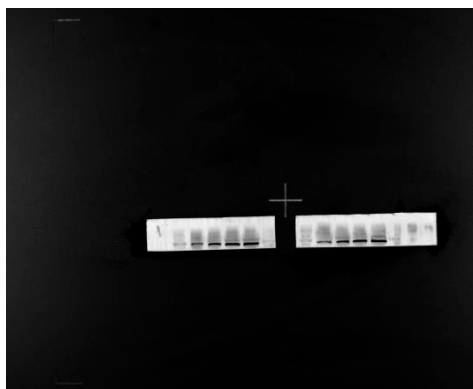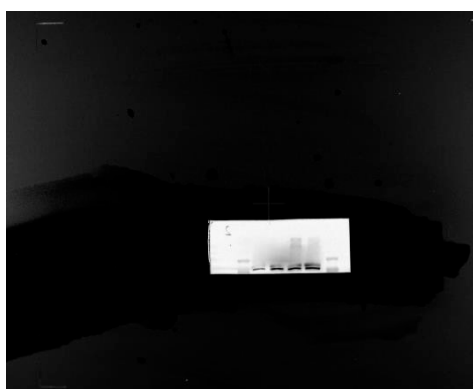

**YAP (n=3)**

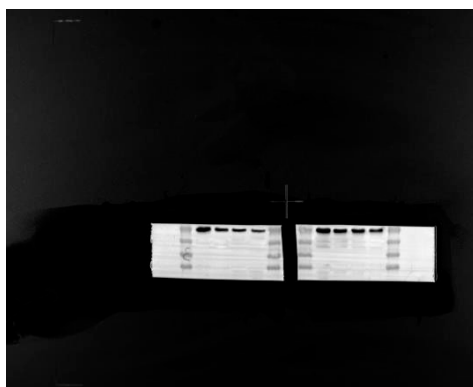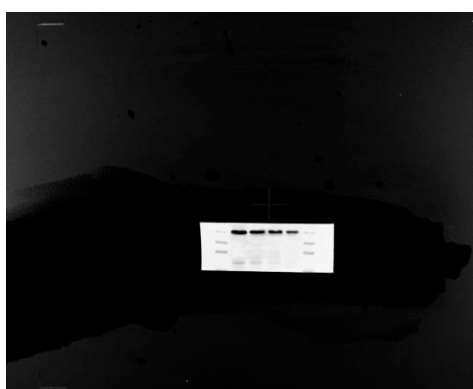

**MOB1 (n=3)**

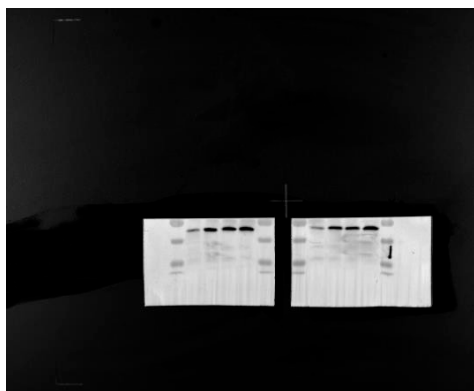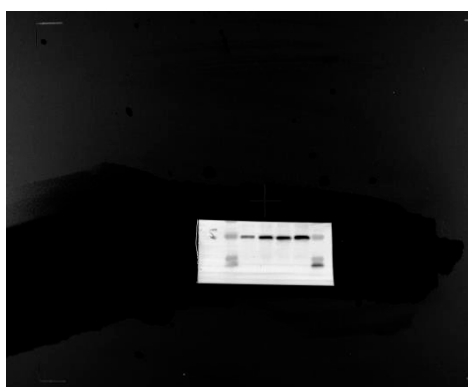

**GAPDH (n=3)**

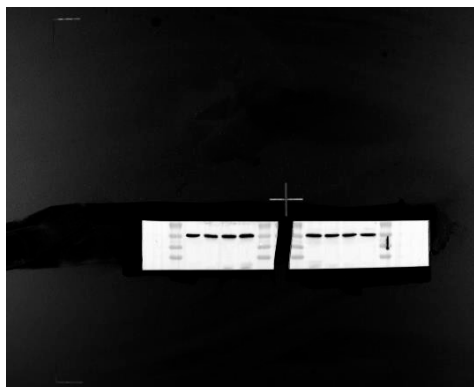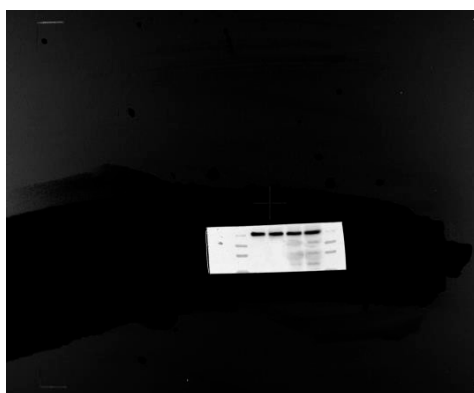

**Figure5C**  
**NF2 (n=3)**



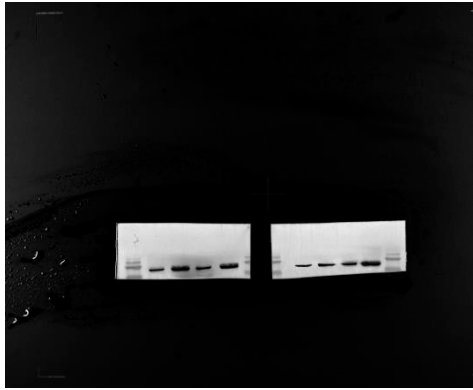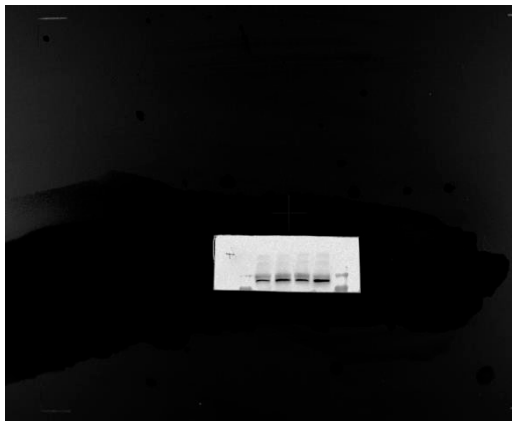

YAP (n=3)

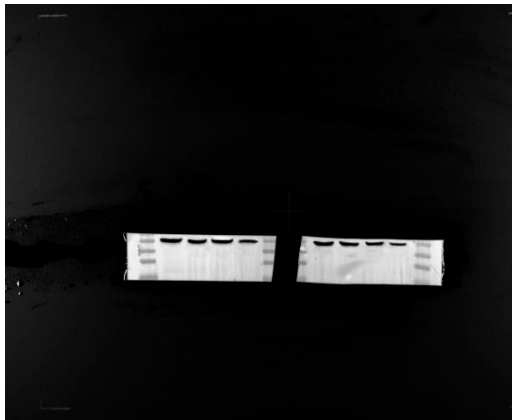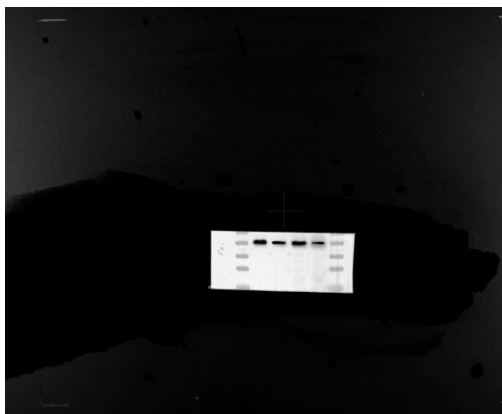

**MOB1 (n=3)**

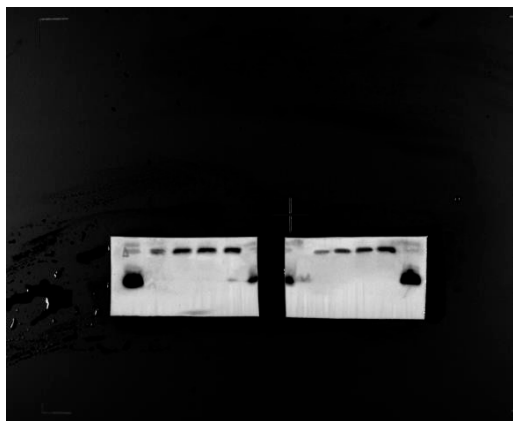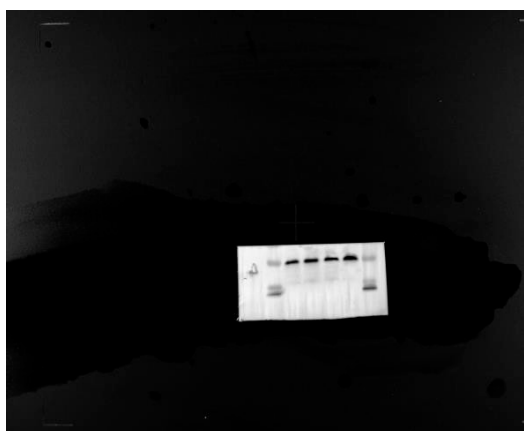

**GAPDH (n=3)**

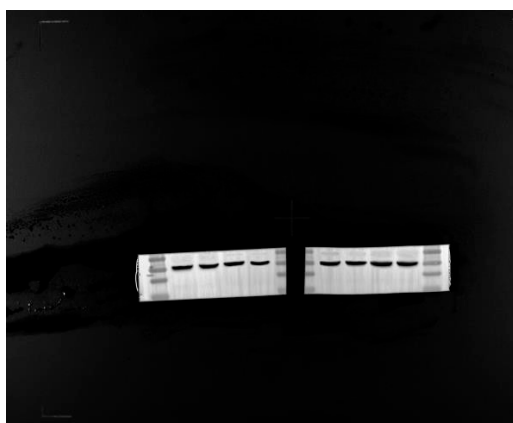

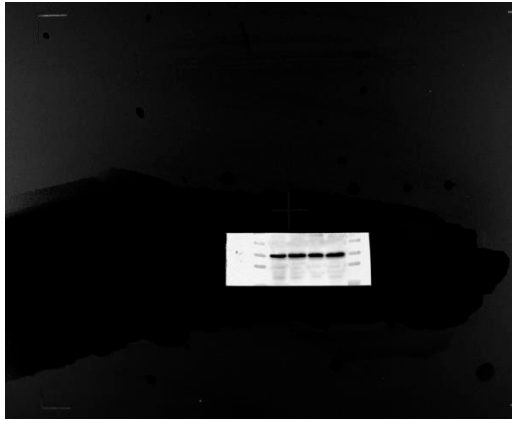

Supplement: s1 [file s1]
